# Supplementary material for: Complex Formation between Cytochrome c and a Tetra-alanino-calix[4]arene
Source: MDPI journal article supplement (doi:10.3390/ijms232315391), 2022-12-06
Supplement: s1 [file s1]

# Complex Formation between Cytochrome *c* and a Tetra-alanino-calix[4]arene

Stefano Volpi <sup>1</sup>, Aishling Doolan <sup>2</sup>, Laura Baldini <sup>1,\*</sup>, Alessandro Casnati <sup>1</sup>, Peter B. Crowley <sup>2</sup> and Francesco Sansone <sup>1</sup>

<sup>1</sup> Dipartimento di Scienze Chimiche, della Vita e della Sostenibilità Ambientale, Università degli Studi di Parma, Viale delle Scienze, 17/A, 43124 Parma, Italy

<sup>2</sup> School of Biological and Chemical Sciences, University of Galway, University Road, H91 TK33 Galway, Ireland

\* Correspondence: laura.baldini@unipr.it

## Supporting Information

### Table of contents

**Figure S1:** <sup>1</sup>H NMR spectrum (D<sub>2</sub>O, 25°C, 500 MHz) of compound **1** (page S2).

**Figure S2:** Overlaid <sup>1</sup>H-<sup>15</sup>N HSQC full-spectra of 0.1 mM cytochrome *c* in the absence or in the presence of 0.1–3.1 mM **1** (page S2).

**Figure S3:** Gel formation observed during crystallization tests for the cytochrome *c* - **1** complex (page S3).

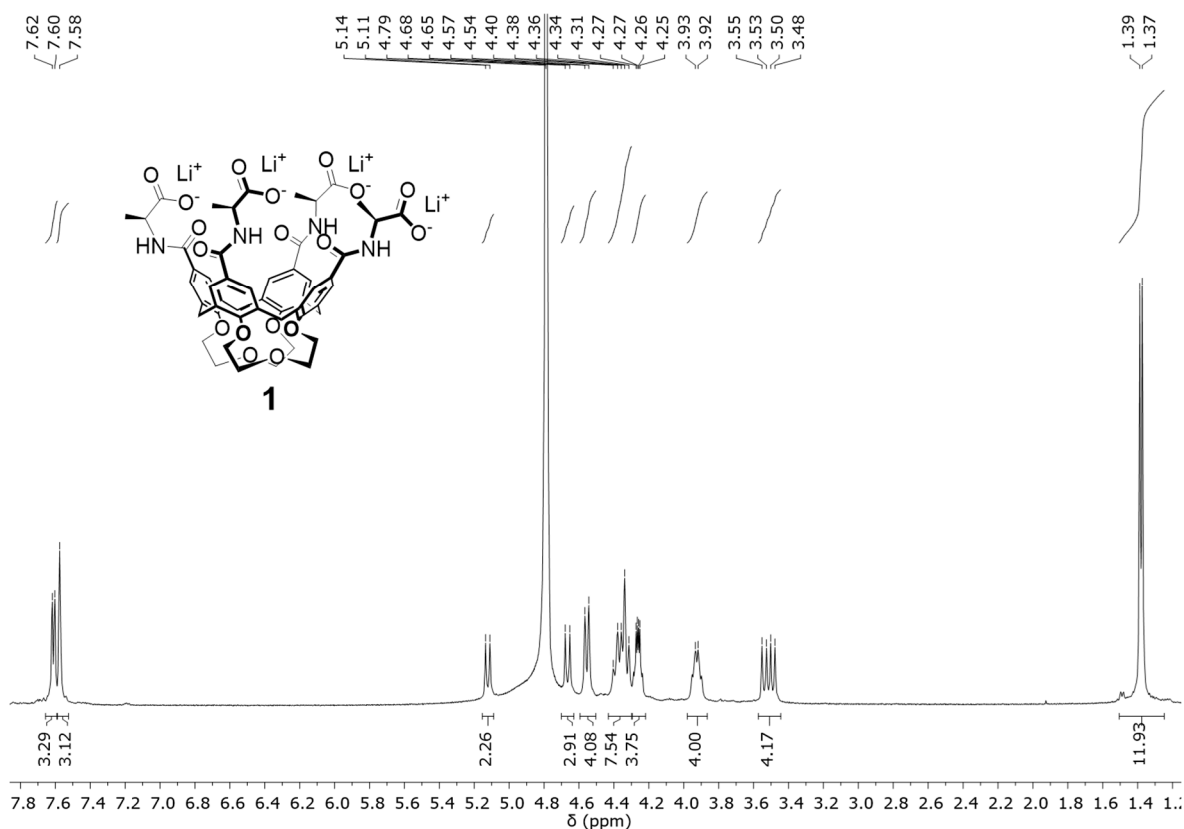

**Figure S1:** <sup>1</sup>H NMR spectrum (D<sub>2</sub>O, 25°C, 500 MHz) of compound **1**.

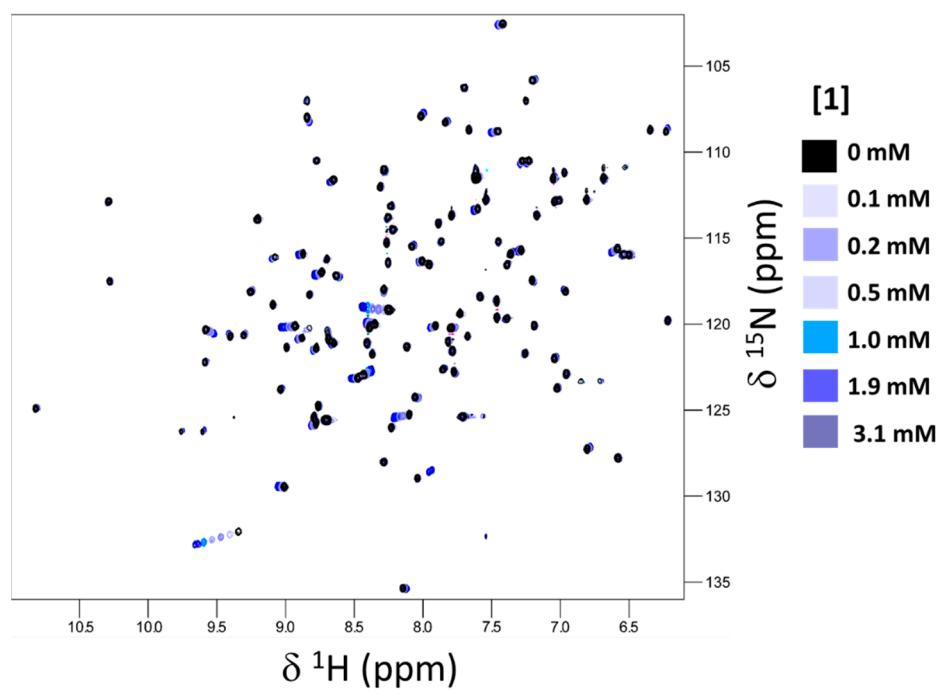

**Figure S2:** Overlaid <sup>1</sup>H-<sup>15</sup>N HSQC full-spectra of 0.1 mM cytochrome *c* in the absence (black contours) or presence of 0.1–3.1 mM **1** (blue scale).

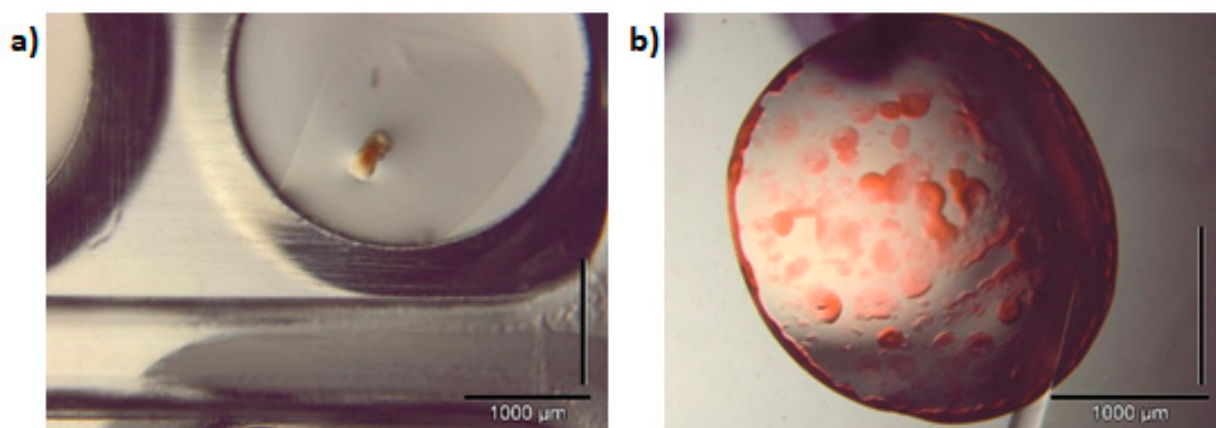

**Figure S3:** Gel formation observed during crystallization tests for the cytochrome c - **1** complex performed by **a)** a robot sitting drop and **b)** manual hanging drop vapor diffusion method (1.7 mM protein, 10 mM ligand). The reservoir solutions were **a)** 20% PEG 6000, 1M LiCl, 100mM sodium citrate buffer (pH 4) and **b)** 25% PEG 8000, 50mM sodium citrate buffer (pH 5).
